# Supplementary material for: α-(Y,Gd)FS:Ce3+: a novel red-emitting fluorosulfide phosphor for solid-state lighting
Source: Royal Society of Chemistry journal article supplement (doi:10.1039/c1jm12819a), 2011-01-01
Supplement: c1jm12819a.pdf [file c1jm12819a.pdf]

## Supplementary Information

# $\alpha$ -(Y,Gd)FS:Ce<sup>3+</sup>: A Novel Red-Emitting Fluorosulfide Phosphor for Solid-State Lighting

Yun-Chen Wu,<sup>a</sup> Yi-Chin Chen,<sup>a</sup> De-Yin Wang,<sup>a</sup> Chi-Shen Lee,<sup>b</sup> Ching-Cherng Sun<sup>c</sup>  
and Teng-Ming Chen<sup>\*a</sup>

<sup>a</sup> *Phosphors Research Laboratory, Department of Applied Chemistry and Institute of Molecular Science, National Chiao Tung University, Hsinchu 30010, Taiwan.*

<sup>b</sup> *Solid-State Inorganic Applied Material Laboratory, Department of Applied Chemistry and Institute of Molecular Science, National Chiao Tung University, Hsinchu 30010, Taiwan.*

<sup>c</sup> *Optics of Solid-State Lighting Laboratory, Department of Optics and Photonics, National Central University, Taoyuan 32001, Taiwan*

E-mail: [tmchen@mail.nctu.edu.tw](mailto:tmchen@mail.nctu.edu.tw); Phone: +886-3-5731695.

**Table S1.** Structural Parameters of  $\alpha$ -(Y<sub>0.99</sub>Ce<sub>0.01</sub>)FS from Rietveld refinement on Powder XRD Data at Room Temperature.

| $\alpha$ -Y <sub>0.99</sub> Ce <sub>0.01</sub> FS |              |            |            |            |           |                                           |
|---------------------------------------------------|--------------|------------|------------|------------|-----------|-------------------------------------------|
| Atoms                                             | Wyckoff site | <i>x/a</i> | <i>y/b</i> | <i>z/c</i> | Occupancy | <i>U</i> <sub>iso</sub> (Å <sup>2</sup> ) |
| Y                                                 | 2 <i>c</i>   | 0.25       | 0.25       | 0.2265(2)  | 0.99      | 0.00026(2)                                |
| S                                                 | 2 <i>c</i>   | 0.25       | 0.25       | 0.6471(4)  | 1         | 0.00257(6)                                |
| F                                                 | 2 <i>a</i>   | 0.75       | 0.25       | 0          | 1         | 0.00104(4)                                |
| Ce                                                | 2 <i>c</i>   | 0.25       | 0.25       | 0.2265(2)  | 0.01      | 0.02526(4)                                |

**Table S2.** Selected bond distances and bond angles of  $\alpha$ -Y<sub>0.99</sub>Ce<sub>0.01</sub>FS at room temperature.

| $\alpha$ -Y <sub>0.99</sub> Ce <sub>0.01</sub> FS |                |
|---------------------------------------------------|----------------|
| Bond distance (Å)                                 |                |
| (Y/Ce)-S                                          | 2.8587(4) (4×) |
| (Y/Ce)-S                                          | 2.7958(2) (1×) |
| (Y/Ce)-F                                          | 2.4313(1) (4×) |

  

| $\alpha$ -Y <sub>0.99</sub> Ce <sub>0.01</sub> FS |                 |
|---------------------------------------------------|-----------------|
| Bond Angle (degree)                               |                 |
| S-(Y/Ce)-S                                        | 72.09(1) (4×)   |
| S-(Y/Ce)-S                                        | 84.574(1) (4×)  |
| S-(Y/Ce)-S                                        | 144.181(1) (2×) |
| F-(Y/Ce)-S                                        | 70.989(4) (4×)  |
| F-(Y/Ce)-S                                        | 135.676(4) (7×) |
| F-(Y/Ce)-S                                        | 129.313(2) (4×) |
| F-(Y/Ce)-F                                        | 66.335(2) (4×)  |
| F-(Y/Ce)-F                                        | 101.374(2) (2×) |

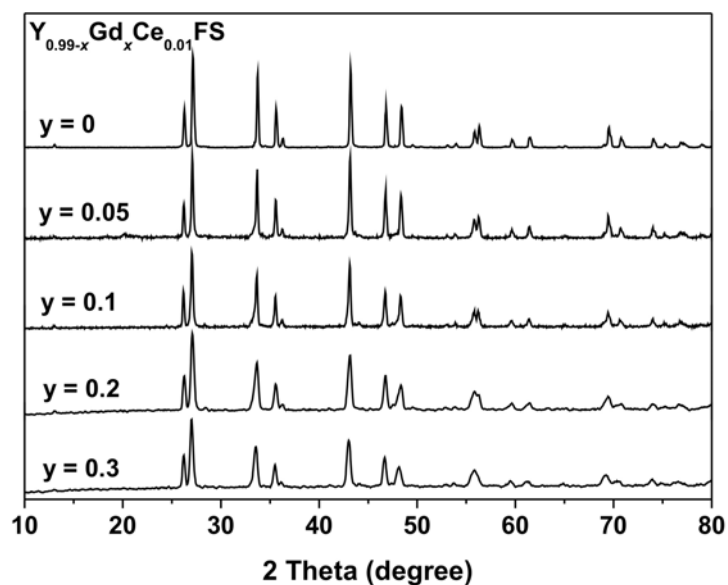

**Figure S1.** Comparison of the XRD patterns of  $\alpha\text{-(Y}_{0.99-y}\text{Ce}_{0.01}\text{Gd}_y\text{)FS}$  ( $y = 0, 0.005, 0.01, 0.02$  and  $0.03$ ) phosphors.

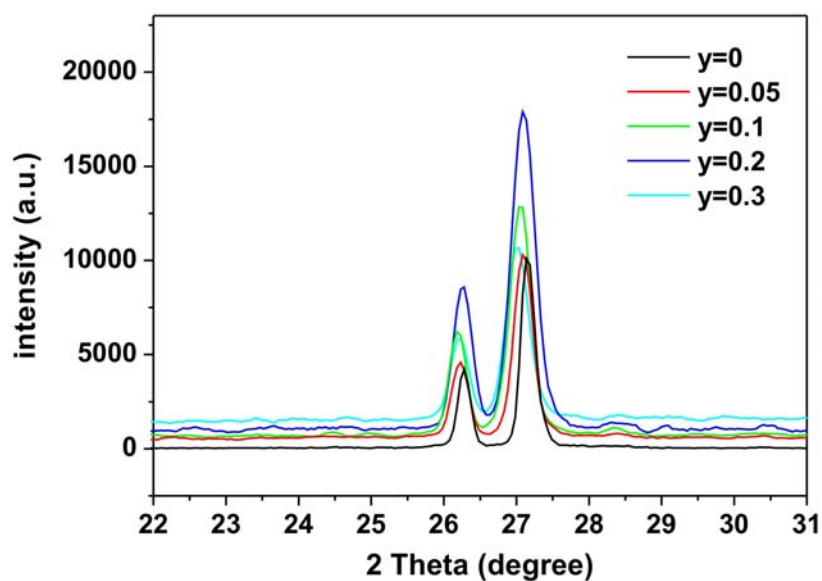

**Figure S2.** Comparison of the PL spectra of  $\alpha\text{-(Y}_{0.99-y}\text{Ce}_{0.01}\text{Gd}_y\text{)FS}$  ( $y = 0, 0.005, 0.01, 0.02$  and  $0.03$ ) phosphors.

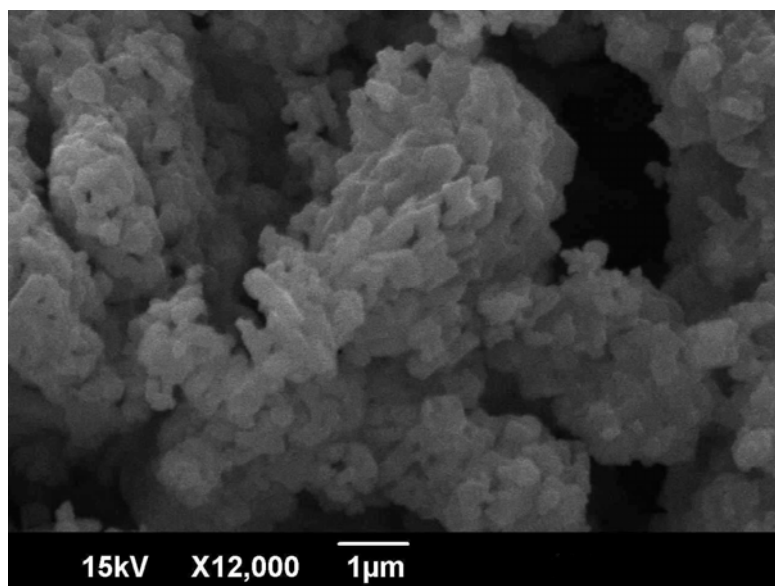

**Figure S3.** The SEM micrographs of the  $\alpha$ -(Y<sub>0.99</sub>Ce<sub>0.01</sub>)FS phosphors.

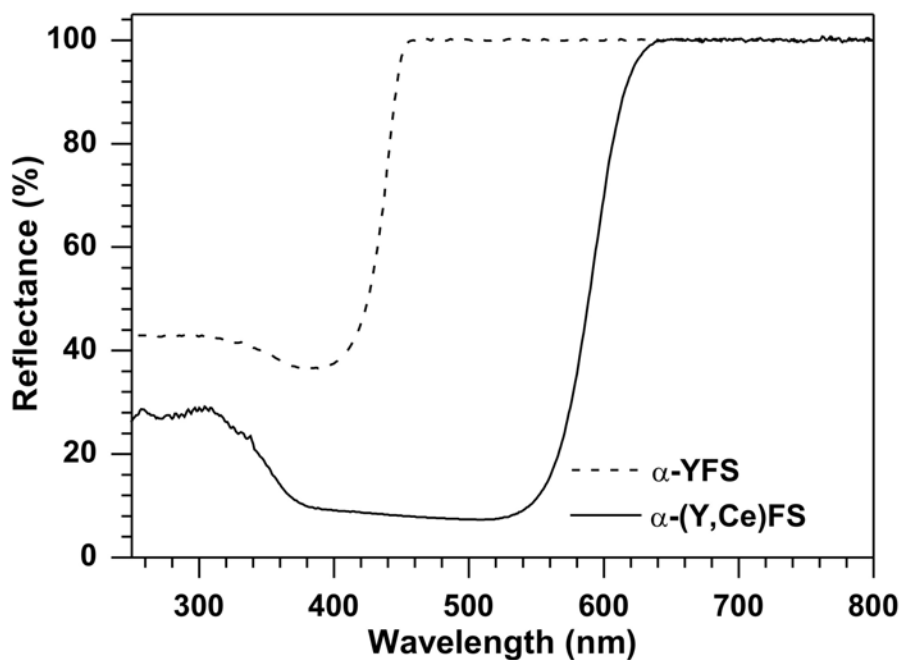

**Figure S4.** The diffuse reflectance spectra of  $\alpha$ -YFS and  $\alpha$ -(Y, Ce)FS.

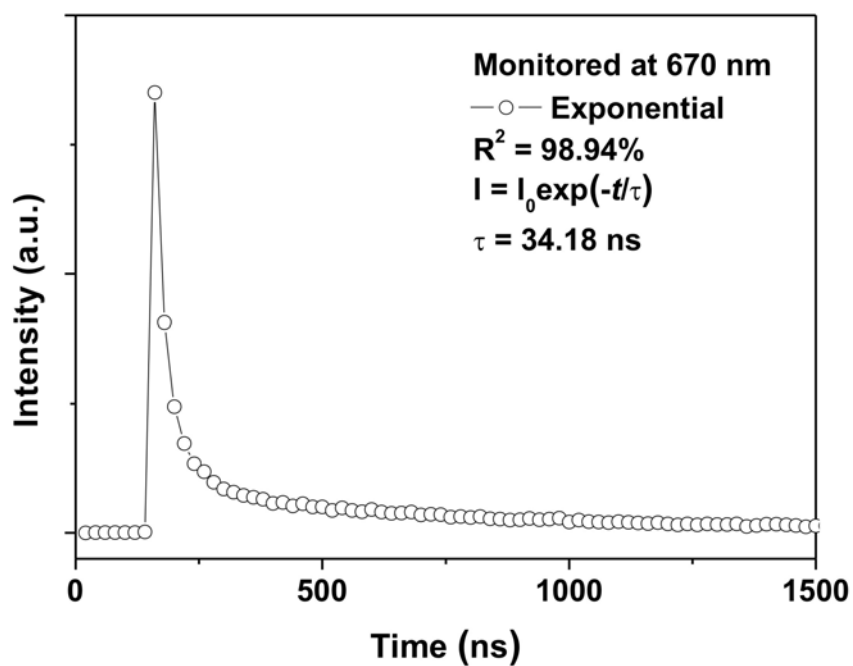

Figure S5. The decay lifetime of the  $\alpha$ -(Y<sub>0.79</sub>Ce<sub>0.01</sub>Gd<sub>0.2</sub>)FS phosphors.
